# Supplementary material
Source: publisher site journal article supplement (https://www.spandidos-publications.com/5912/downloadSupplementary)

Figure S1. Immunohistochemical examination to confirm diagnosis. (A) Cytokeratin 5/6. (B) Estrogen receptor. (C)  $\alpha$ -smooth muscle actin. Representative images were observed at a magnification of x200.

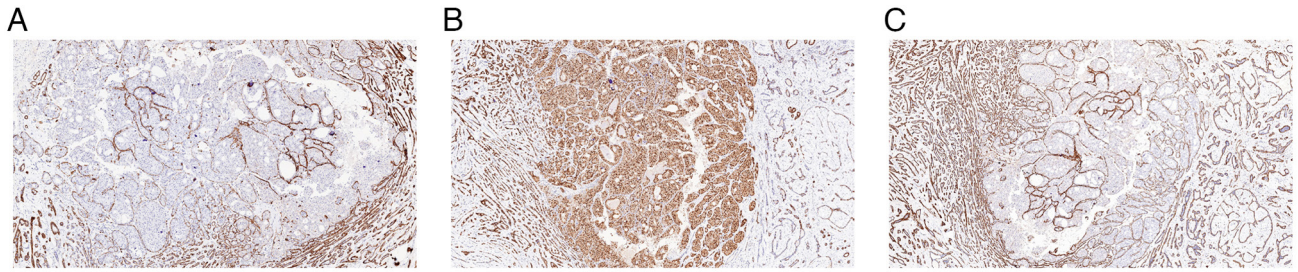

Supplement: Supplementary file 1 [file downloadSupplementary]
